# Supplementary material for: Motivational Interviewing to Increase Physical Activity Behavior in Cancer Patients: A Pilot Randomized Controlled Trials
Source: PubMed Central journal article supplement — Integr Cancer Ther. 2020 Mar 22;19:1534735420914973. doi: 10.1177/1534735420914973 (PMC7092651; doi:10.1177/1534735420914973), 2020-03-22
Supplement: ICT_-_Supplementary_Material_1_-_revised_version_-_V2.pdf [file ICT_-_Supplementary_Material_1_-_revised_version_-_V2.pdf]

**Supplementary Material 1.** Descriptive statistics (medians with 1<sup>st</sup> (Q<sub>1</sub>) and 3<sup>rd</sup> (Q<sub>3</sub>) quartiles) of physical activity (PA) behavior, anthropometrics and physical fitness in the experimental and control group, respectively, at baseline, 3 months and 6 months.

|                                     | Experimental group<br>Median (Q <sub>1</sub> , Q <sub>3</sub> ) |                                |                                | Control group<br>Median (Q <sub>1</sub> , Q <sub>3</sub> ) |                      |                      |
|-------------------------------------|-----------------------------------------------------------------|--------------------------------|--------------------------------|------------------------------------------------------------|----------------------|----------------------|
|                                     | Baseline<br>n=8                                                 | 3 months<br>n=8                | 6 months<br>n=6                | Baseline<br>n=11                                           | 3 months<br>n=11     | 6 months<br>n=9      |
| <b>PA behavior</b>                  |                                                                 |                                |                                |                                                            |                      |                      |
| Wear time (h)                       | 164.9 (152.0, 166.1)                                            | 158.2 (147.0, 158.9)           | 156.5 (123.5, 157.4)           | 165.5 (155.6, 167.4)                                       | 156.0 (131.0, 163.5) | 138.1 (115.4, 160.8) |
| Sedentary behavior (h/week)         | 59.8 (57.8, 61.5)                                               | 62.8 (52.4, 63.6)              | 60.0 (56.4, 60.2)              | 55.8 (50.9, 60.0)                                          | 51.6 (44.2, 58.1)    | 49.7 (38.5, 57.1)    |
| Moderate PA (h/week)                | 9.9 (7.9, 10.7)                                                 | 10.3 (6.0, 11.4)               | 8.9 (8.7, 10.2)                | 8.6 (7.2, 10.4)                                            | 9.0 (6.4, 9.2)       | 6.6 (5.6, 8.5)       |
| Vigorous PA (h/week)                | 0.1 (0.0, 0.8)                                                  | 0.2 (0.0, 0.2)                 | 0.2 (0.0, 0.8)                 | 0.1 (0.0, 0.2)                                             | 0.1 (0.0, 0.3)       | 0.0 (0.0, 0.2)       |
| MVPA (h/week)                       | 10.4 (8.4, 10.8)                                                | 10.4 (7.0, 11.6)               | 9.5 (8.9, 10.3)                | 8.7 (7.4, 10.5)                                            | 9.0 (6.7, 9.2)       | 6.7 (5.6, 8.7)       |
| <b>Anthropometrics</b>              |                                                                 |                                |                                |                                                            |                      |                      |
| BMI (kg/m <sup>2</sup> )            | 26.1 (23.2, 27.0)                                               | 26.1 (23.5, 27.3)              | 24.9 (23.2, 26.2)              | 22.5 (20.3, 26.9)                                          | 23.1 (20.1, 27.6)    | 22.4 (18.9, 25.4)    |
| <b>Physical fitness</b>             |                                                                 |                                |                                |                                                            |                      |                      |
| 30s chair stand (n)                 | 16.5 (14.5, 18.2)                                               | 18.5 (15.0, 22.5) <sup>a</sup> | 20.0 (18.2, 21.7) <sup>a</sup> | 16.0 (15.0; 17.0)                                          | 18.0 (14.5; 21.5)    | 17.0 (15.0; 19.0)    |
| Handgrip strength (kg) <sup>b</sup> | 28.0 (26.2, 33.0)                                               | 30.0 (28.5, 33.2)              | 32.5 (31.2, 33.7) <sup>a</sup> | 28.0 (22.5, 30.5)                                          | 26.0 (18.5, 31.0)    | 22.0 (20.0, 31.0)    |
| Cardiovascular fitness (stage)      | 28.5 (25.2, 33.7)                                               | 31.0 (25.0, 32.5)              | 33.0 (31.0, 34.0)              | 25.0 (22.0, 30.0)                                          | 26.0 (22.0, 30.5)    | 29.0 (24.0, 34.0)    |

<sup>a</sup> significantly different from baseline (p < 0.05)

<sup>b</sup> significant group by time interaction (p < 0.05)

MVPA: moderate-to-vigorous physical activity
