# Supplementary material for: Motivational Interviewing to Increase Physical Activity Behavior in Cancer Patients: A Pilot Randomized Controlled Trials
Source: PubMed Central journal article supplement — Integr Cancer Ther. 2020 Mar 22;19:1534735420914973. doi: 10.1177/1534735420914973 (PMC7092651; doi:10.1177/1534735420914973), 2020-03-22

**Supplementary Material 2.** Box plots of the quality of life index score (panel A) and the VAS representing the perceived general health (panel B) in the control group and the experimental group before, during and after the intervention/control period.

A

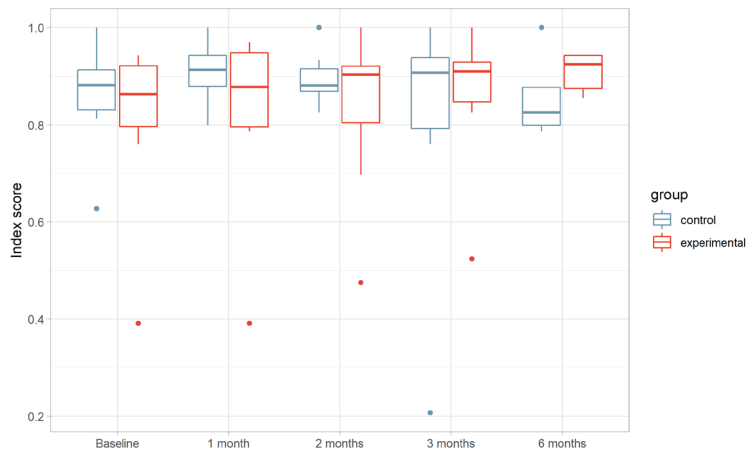

B

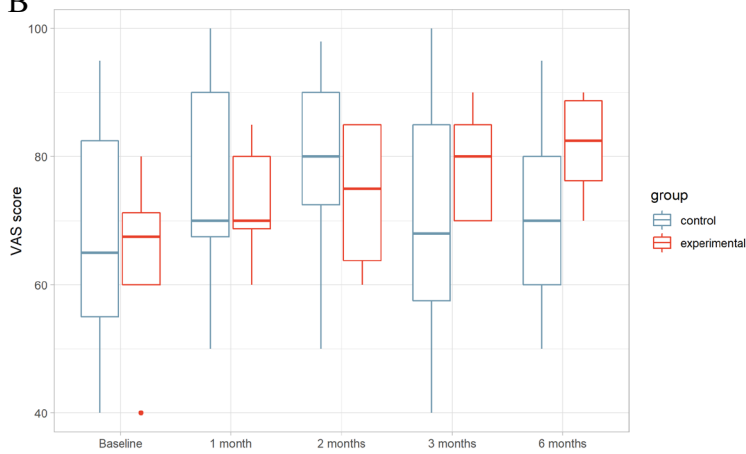

Supplement: ICT_-_Supplementary_Material_2_-_revised_version_-_V2.pdf [file ICT_-_Supplementary_Material_2_-_revised_version_-_V2.pdf]
